# Supplementary material for: A Population-Based Threshold of Protection for COVID-19 Vaccines
Source: Research Square preprint supplement (doi:10.21203/rs.3.rs-832531/v1), 2021-08-31
Supplement: Supplementary file 1 [file 68d5cfbf39effb1cf4f25c9c.docx]

**A Population-Based Correlate of Protection for COVID-19 Vaccines**

**Tables and Figures for Supplement**

| Vaccine Name | Manufacturer | Number of Subjects  One Dose /Two Dose | Gender Ratio Female/  Male | Median Age Yrs  (range) | Median Days Between Doses (range) | Median Days from First Dose to post dose 1 Bleed (range) | Median Days from Final Dose to Bleed (range) |
| --- | --- | --- | --- | --- | --- | --- | --- |
| mRNA 1273 | **Moderna** | **19/19** | **1.6** | **35(20-55)** | **27(26-28)** | **27(26-28)** | **7(7-8)** |
| BNT 162b2 | **Pfizer** | **36/51** | **1.8** | **43(21-77)** | **21(20-60)** | **23(7-54)** | **8(7-29)** |
| ChadOx1/AZ 1222 | **AstraZeneca** | **28/21** | **2.6** | **60(23-70)** | **66(33-79)** | **22(19-31)** | **8(7-10)** |
| Ad26.COV2.S | **J&J** | **25/NA** | **1.2** | **48(31-69)** | **N/A** | **N/A** | **34(20-31)** |

**Table S1: Demographics of Vaccine Cohorts.** The demographics of the four vaccine cohorts and characteristics of their samples which are included in analysis are shown.

| Vaccine Name | Manufacturer | GMC anti-RBD IgG (CI) to Original | GMC anti-RBD IgG (CI) to Alpha |
| --- | --- | --- | --- |
| mRNA 1273 | **Moderna** | **7614 (5676-10,214)** | **7894 (5858-10,638)** |
| BNT 162b2 | **Pfizer** | **3600 (2856-4539)** | **3713 (2935-4618)** |
| ChadOx1/AZ 1222 | **AstraZeneca** | **280 (201-390)** | **310 (221-433)** |
| Ad26.COV2.S | **J&J** | **78 (46-131)** | **75 (44-129)** |

**Table S2: Anti-RBD IgG GMC to Original Virus and Alpha Variant**. IgG Geometric Mean Concentration (GMC), 95% CI (BAU/ml) for the 4 vaccine cohorts are displayed for antibody directed to RBD of original and alpha variant following complete course of indicated vaccines. Antibody concentrations are expressed in standardized binding antibody units (BAU/ml) calibrated against the WHO international standard using assignment of 1000 units for RBD. A Kruskal Wallis test demonstrated significant difference between group and pair wise comparison using a rank based test demonstrated p<0.001 for all groups except for J&J one dose compared to AstraZeneca (p<0.002), Pfizer compared to Moderna (p<0.02).

| Vaccine | Efficacy (CI)  To Original | Source of  Data for Original | Efficacy/Effectiveness (CI)  To Alpha | Source of Data for Alpha |
| --- | --- | --- | --- | --- |
| Moderna  One Dose  Two Doses | **81(64-90)**  **94.1 (89.3-96.8)** | **MMWR1**  **Baden et al2** | **88.1 (83.7-91.5)**  **100* (91.8-100*)** | **Chemaitelly et al7**  **Chemaitelly et al7** |
| Pfizer  One Dose  Two Doses | **81 (64-90)**  **94.6 (89.9-97.3)** | **MMWR1**  **Polack et al3** | **47.5 (41.6-52.8)**  **93.7 (91.6-95.3)** | **Lopez Bernal et al4**  **Lopez Bernal et al4** |
| AstraZeneca  One Dose  Two Doses (>12 weeks) | **76 (59.3-85.9)**  **80.7 (66.5-88.9)** | **Voysey et al5**  **Voysey et al5** | **48.7 (45.2-51.9)**  **74.5 (68.4-79.4)** | **Lopez Bernal et al4**  **Lopez Bernal et al4** |
| J&J  One Dose (US) | **72 (58.2-81.7)** | **Sadoff et al6** |  |  |

**Table S3: Data and Sources for Efficacy and Effectiveness Used in Analysis.** Data and the reference sources for efficacy or effectiveness estimates with 95% CI used in our analysis are shown. For efficacy against original strain data from the Phase 3 efficacy trials was used for vaccines authorized for two doses and for one dose for J&J. For J&J, the efficacy for US trial was utilized as representative for original strain. For the AstraZeneca two dose estimate for original virus, the data for those with an interval between doses of > 12 weeks between doses was utilized. For the one dose data on both mRNA vaccines, the largest and most recent data from MMWR were utilized and pooled as was done in the reference. The estimate of 81% for the original strain is within the range of other studies including data from Israel and UK as reviewed in the MMWR reference. For the alpha efficacy/effectiveness data, both UK data and Qatar data were utilized although definitions of outcomes were slightly different (e.g. some asymptomatic cases included in Qatar data) and there were differences in age of populations. The asterisk indicates that for analyses 98% was used as a substitute for 100% efficacy; this represents the efficacy estimated after adding a pseudo-count to the number of participants in each of the four groups that contributes to estimation of efficacy: with and without disease, with and without vaccine.

**Figure S1: ACE2 Inhibition to Spike and RBD for Fully Immunized Cohorts for Original and Alpha Virus**: To evaluate the function of antibody in an ELISA format, the ability of sera to inhibit binding of ACE-2 protein to receptor on Spike and RBD were measured. Results are displayed for individuals for each vaccine cohort with ACE2 inhibition in panel a) to Spike and b) to RBD with GMCs expressed as bars and vertical whiskers shown for 95% CI to both original and alpha variant. Results are expressed as concentration induced by addition of individual sera relative to inhibition achieved by an RBD monoclonal antibody (further details in Methods).The upper limit of the assay signifies 100% inhibition.

**
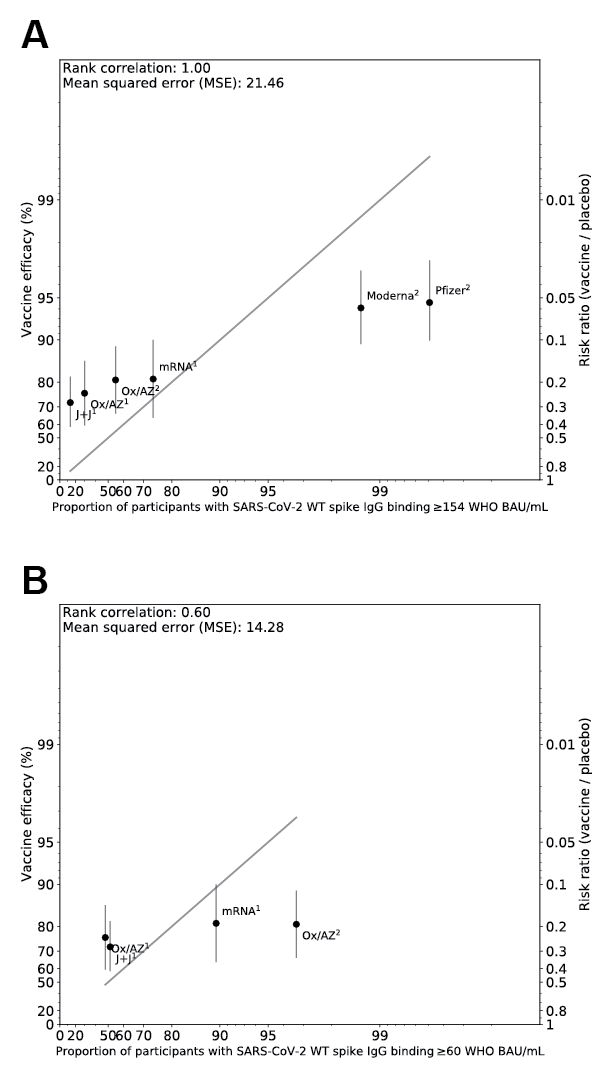
**

**Figure S2. Association of vaccine efficacy with the proportion of individuals above a protective threshold.** Vaccine efficacy/effectiveness (VE) and SARS-CoV-2 spike binding IgG, both against the original (WT) strain virus (for VE) and spike antigen (for IgG). Binding IgG level (x-axis) is expressed for each vaccine as the proportion of participants with binding antibody above a putative protective threshold of either (A) 154 BAU/mL derived from all vaccines or (B) 60 BAU/mL derived from all except the two-dose Moderna and Pfizer vaccines. Superscript 1 or 2 indicates the number of doses for the vaccine regimen. The y-axis is estimated log risk-ratio reported on the vaccine efficacy scale. The x-axis is the proportion of participants with binding antibody above the threshold (log-scale) with IgG antibody binding measured by MSD and calibrated to the WHO standard (binding antibody units per mL). Error bars indicate 95% confidence intervals for VE (y-axis). Under a model of an absolute protective threshold VE is expected to be equal to the proportion of participants above the threshold (solid line). Mean squared error (MSE) evaluates the ability of the threshold to predict VE and is computed based on the deviation of the observed VE from the expected (solid line), with and without the two-dose Moderna and Pfizer regimens.

**References**

1. Thompson, M.G.*, et al.* Interim Estimates of Vaccine Effectiveness of BNT162b2 and mRNA-1273 COVID-19 Vaccines in Preventing SARS-CoV-2 Infection Among Health Care Personnel, First Responders, and Other Essential and Frontline Workers - Eight U.S. Locations, December 2020-March 2021. *MMWR Morb Mortal Wkly Rep* **70**, 495-500 (2021).

2. Baden, L.R.*, et al.* Efficacy and Safety of the mRNA-1273 SARS-CoV-2 Vaccine. *N Engl J Med* **384**, 403-416 (2021).

3. Polack, F.P.*, et al.* Safety and Efficacy of the BNT162b2 mRNA Covid-19 Vaccine. *N Engl J Med* **383**, 2603-2615 (2020).

4. Lopez Bernal, J.*, et al.* Effectiveness of Covid-19 Vaccines against the B.1.617.2 (Delta) Variant. *N Engl J Med* (2021).

5. Voysey, M.*, et al.* Single-dose administration and the influence of the timing of the booster dose on immunogenicity and efficacy of ChAdOx1 nCoV-19 (AZD1222) vaccine: a pooled analysis of four randomised trials. *Lancet* **397**, 881-891 (2021).

6. Sadoff, J.*, et al.* Safety and Efficacy of Single-Dose Ad26.COV2.S Vaccine against Covid-19. *New Engl Jl of Med* **384**, 2187-2201 (2021).

7. Chemaitelly, H., *et al.* mRNA-1273 COVID-19 vaccine effectiveness against B.1.1.7 and B.1.351 variants and sever COVID-19 disease in Qatar. *Nat Med (2021).*
